# Supplementary material for: Contriving Multi-Epitope Subunit of Vaccine for COVID-19: Immunoinformatics Approaches
Source: PubMed Central journal article supplement (PMC7399176; doi:10.3389/fimmu.2020.01784), 2020-07-28
Supplement: Data_Sheet_1.pdf [file Data_Sheet_1.pdf]

## Supplementary Material

### Contriving Multi-epitope Subunit of Vaccine for COVID-19:

#### Immunoinformatics Approaches

*Rong Dong<sup>1,2,3</sup>, Fuxun Yu<sup>3</sup>, Yan Zha<sup>1,2,3</sup>*

<sup>1</sup> Guizhou University School of Medicine, Guiyang, Guizhou Province, China

<sup>2</sup> Department of Nephrology, Guizhou Provincial People's Hospital, Guiyang, Guizhou Province, China

<sup>3</sup> NHC Key Laboratory of Pulmonary Immunological Diseases (Guizhou Provincial People's Hospital), Guiyang, Guizhou Province, China

Run title: Contriving COVID-19 Vaccine by Immunoinformatics.

#### Correspondence

Rong Dong: [drvivid1990@163.com](mailto:drvivid1990@163.com)

#### ORCID

Rong Dong: 0000-0003-2372-9833

### **Homology Modeling SARS-COV-2 proteins**

c1yo4A [NMR structure of the SARS coronavirus orf 7a coded X42 protein (c1yo4A), residues 16–98] for orf 7a protein of SARS-CoV-2 (identity: 92%, coverage: 69%); d1xaka [x-ray structure of the accessory protein X4 (ofr7), residues 23–42] for orf 8 protein of SARS-CoV-2 at 1.80 angstroms resolution (identity: 30%, coverage: 15%); c1uw7A [[x-ray structure structure of the SARS coronavirus nsp9 protein (c1yo4A) at 3.0 angstroms resolution, residues 1–113] for nsp9 protein of SARS-CoV-2 (identity: 97%, coverage: 99%); c6irwA [crystal structure of the human cap-specific adenosine2 methyltransferase bound to SAH, residues 258–285] for nsp6 protein of SARS-CoV-2 (identity: 29%, coverage: 9%); c4yptA [x-ray structure of three tandemly linked domains of nsp3 from murine2 hepatitis virus at 2.60 angstroms resolution, residues 675-1053] for nsp3 protein of SARS-CoV-2 (identity: 27%, coverage: 19%); c2rhbD [Crystal structure of nsp15-h234a mutant-hexamer in 2 asymmetric unit, residues 1-344] for endoRNase of SARS-CoV-2 (identity: 88%, coverage: 99%); d2o5ha1[NMB0513-like, residues 66–115] for ORF3a protein of SARS-CoV-2 (identity: 24%, coverage: 17%); c3sc0A [crystal structure of mmachc (1–238), a human b12 processing enzyme,2 complexed with methylcobalamin, residues 5–24] for membrane glycoprotein of SARS-CoV-2 (identity: 25%, coverage: 9%); d1sska [Coronavirus RNA-binding domain, residues 23–180] for nucleocapsid phosphoprotein of SARS-CoV-2 (identity: 82%, coverage: 32%); (see for the homology models and Figure S1 for the template-target pairwise sequence alignments)

**STABE1. The details of structure homology of SARS-CoV-2 proteins to human proteins**

| Molecule                    | Based PBD Model | Organism                | identify | coverage |
|-----------------------------|-----------------|-------------------------|----------|----------|
| ORF7a protein               | Clyo4a          | SARS coronavirus        | 92%      | 69%      |
| ORF8 protein                | d1xaka          | SARS coronavirus        | 30%      | 15%      |
| nsp9                        | c1uw7A          | SARS coronavirus        | 97%      | 99%      |
| nsp6                        | c6irwA          | Human                   | 29%      | 9%       |
| nsp3                        | c4yptA          | murine2 hepatitis virus | 27%      | 19%      |
| endoRNase                   | c2rhbD          | Virtus                  | 88%      | 99%      |
| ORF3a protein               | d2o5ha1         | -                       | 24%      | 17%      |
| membrane glycoprotein       | c3sc0A          | Human                   | 25%      | 9%       |
| nucleocapsid phosphoprotein | d1sska          | coronavirus             | 82%      | 37%      |

**The ramachandran plots details of the templates used to model the structure of SARS-COV-2 proteins.**

Ramachandran plots of the modeled ORF7a proteins of SARS-COV-2 showed 97.53% in the favored regions, ramachandran plots of the modeled ORF8 proteins of SARS-COV-2 showed 94.44% in the favored regions, ramachandran plots of the modeled nsp9 proteins of SARS-COV-2 showed 95.50% in the favored regions, ramachandran plots of the modeled nsp6 proteins of SARS-COV-2 showed 96.15% in the favored regions, ramachandran plots of the modeled nsp3 proteins of SARS-COV-2 showed 96.2% in the favored regions, ramachandran plots of the modeled endoRNase proteins of SARS-COV-2 showed 99.12% in the favored regions, ramachandran plots of the modeled ORF3a protein proteins of SARS-COV-2 showed 100% in the favored regions, ramachandran plots of the modeled membrane glycoprotein of SARS-COV-2 showed 100% in the favored regions, ramachandran plots of the modeled nucleocapsid phosphoprotein of SARS-COV-2 showed 98.20% in the favored regions.

**STABLE2. Ramachandran plots details of SARS-COV-2 proteins of SARS-CoV-2**

**proteins structure**

| Molecule                    | Template | identify | coverage | favored region | Rotamer Outliers |
|-----------------------------|----------|----------|----------|----------------|------------------|
| ORF7a protein               | 1yo4.1.A | 92%      | 69%      | 97.53%         | 0                |
| ORF8 protein                | d1xaka   | 30%      | 15%      | 94.44%         | 0                |
| nsp9                        | c1uw7A   | 97%      | 99%      | 95.50%         | 0                |
| nsp6                        | c6irwA   | 29%      | 9%       | 96.15%         | 4.35%            |
| nsp3                        | c4yptA   | 27%      | 19%      | 96.2%          | 0.3%             |
| endoRNase                   | c2rhbD   | 88%      | 99%      | 99.12%         | 0%               |
| ORF3a protein               | d2o5ha1  | 24%      | 17%      | 100%           | 2.3%             |
| membrane glycoprotein       | c3sc0A   | 25%      | 9%       | 100.00%        | 5.26%            |
| nucleocapsid phosphoprotein | d1sska   | 82%      | 37%      | 98.20%         | 0.0%             |

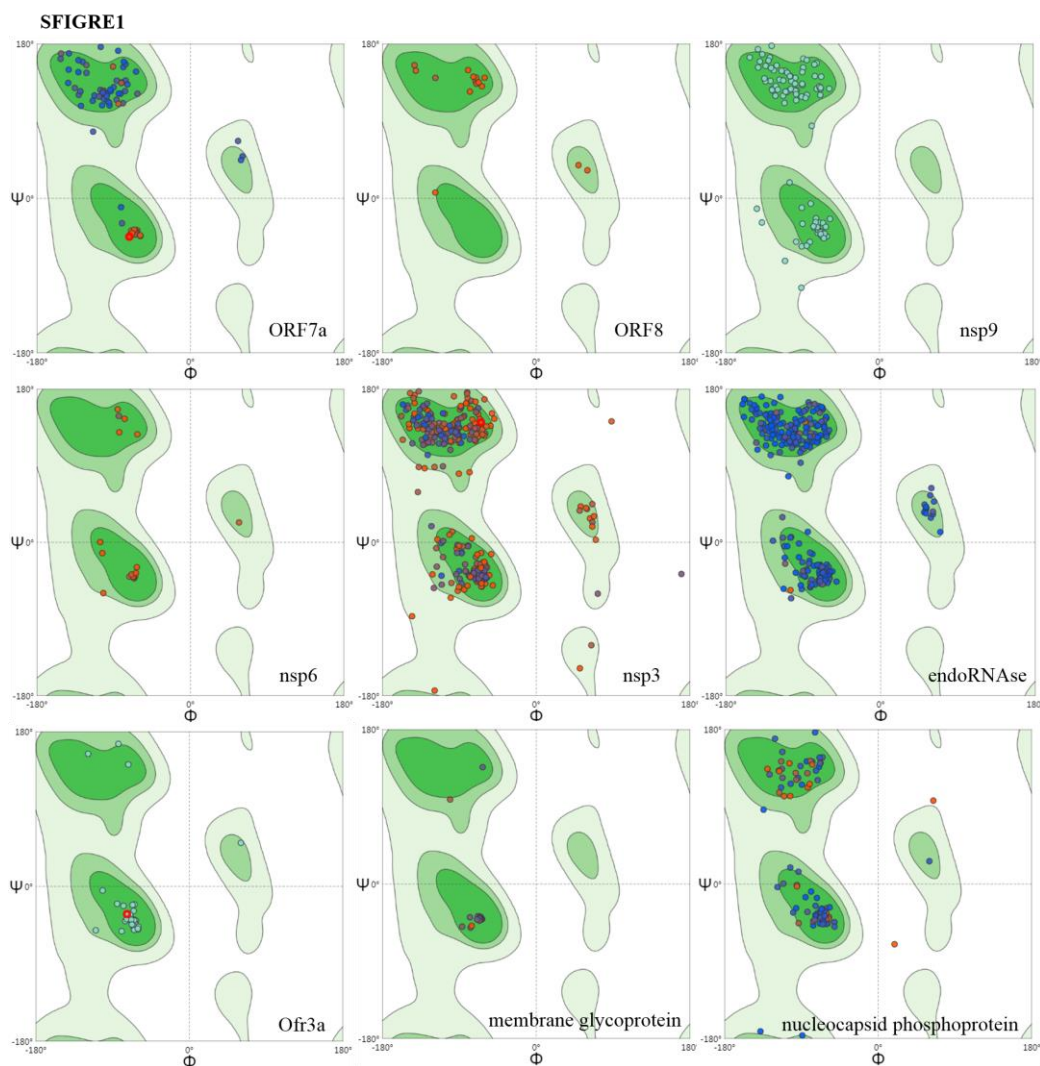

**SFIGURE1: Ramachandran plots indicating the quality of the 3D structures of the SARS-COV-2 protein models.**

SFIGRE2

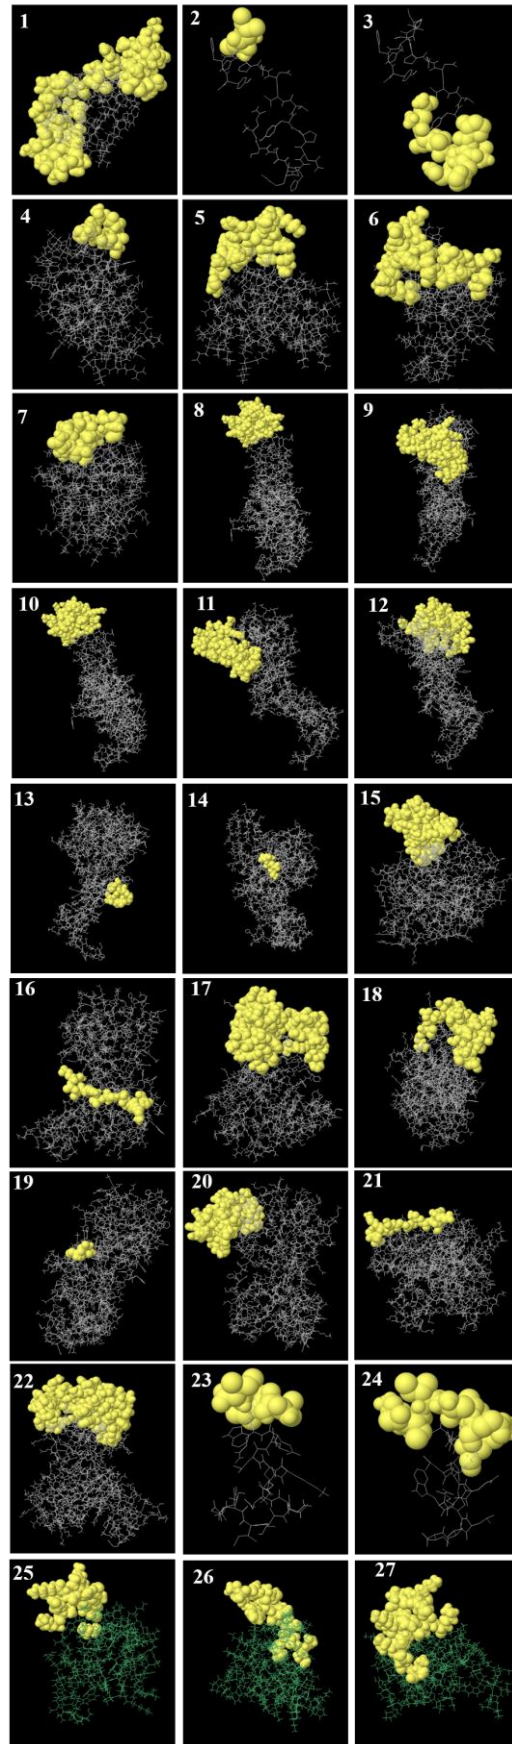

**FIGURE 2. ElliPro predicted discontinuous B-cell epitopes of SARS-COV-2**

represented in 3D. The numbers of the predicted epitope regions for each protein correspond to the number of prediction in TABLE5.

**Sequence of Vaccine Construction**

EAAAKKAKFVAAWTLKAAAEAAAKGIINTLQKYYCRVRGGRCVLSCLP  
KEEQIGKCTRGRKCCRKKEAAAKAAAYKLFIRQEEVAAAYTLCFTLKRKAAAY  
AAYSPIFLIVAAAYALLSDLQDLAAAYFLLPSLATVAAAYSAFAMMFVKAAAYMP  
ASWVMRIAAAYVMYMGTLASYAAAYLLDDDFVEIAAAYSPFGHSLTAAAYIMRLWL  
CWKAAAYLSYFIASFRAAAYLPKEITVATAAAYLLDRLNQLAAAYKTFPPTPEPKAAAY  
FPRGQGVPIAAAYIPIQASLPFAAAYGLMWLSYFIGPGPGHFYISKWYIRVGARKSG  
PGPGIHFYISKWYIRVGARKGPGPGKGLNNLNRMVLSLGPGPGETAFGLVAE  
WFLAYILGPGPAAAIMQLFFSYFAVHFGPGPGGLAKRFKESPFLEEDGPGPGA  
CFVLAAYRINWITGPGPGKLIFLWLLWPVTLACGPGPGDDQIGYYRRATRRI  
RGPGPGGKMKDLSRWYFYLLGPGPGDFLEYHDVRRVLDFIGPGPGRGTTLK  
EPCSSGPHPLADNKCCPDGVRVSPKLFIREEELKKSSKTPEEHFIETISLAGSY  
KDWSYSQSTQLGIEFLKRGDKSVYYTSPNPTTFHLDGEVITFDNLLRKKHCN  
LLLLFKKSGTYEGNSPFHPLADNKKKSPIQYIDIGNYTVSCKKHFYISKWYIRV  
GARKSAKKKGPKVKYLYFIKGLNNKAGTTQACTDDNALAYKKDFLELAM  
DEFIERYKLLKKTSPISEHDYQIGGYTEKHHVQIHTIDGSSGVVNPKKYRIGNYK  
LNTDHSSSKKNGTITVEELKKLLEKKKSAAEASKKPRQKRTAKKKEGALNTPK  
DHIGTRNPKKTGALLAAGAAAKK

**SFIGURE 3. The sequence of 2019nCOV vaccine construct**

**BLAST**® >> [blastp suite](#) >> results for RID-DEKUD0VG014

Your search is limited to records that include: Homo sapiens (taxid:9606)

Job Title [Protein Sequence...](#)  
 RID [DEKUD0VG014](#) Search expires on 06-04 15:20 pm  
 Program BLASTP  
 Database nr  
 Query ID Icl|Query\_37817  
 Description [None...](#)  
 Molecule type amino acid  
 Query Length 864

| Description                                | Max Score | Total Score | Query Cover | E value | Per. Ident | Accession                      |
|--------------------------------------------|-----------|-------------|-------------|---------|------------|--------------------------------|
| beta-defensin 3 [Homo sapiens]             | 104       | 104         | 5%          | 3e-26   | 100.00%    | <a href="#">AAV41025.1</a>     |
| beta-defensin-like protein [Homo sapiens]  | 104       | 104         | 5%          | 9e-26   | 93.88%     | <a href="#">ACK99045.1</a>     |
| beta-defensin 103 precursor [Homo sapiens] | 103       | 103         | 5%          | 2e-25   | 100.00%    | <a href="#">NP_001075020.1</a> |
| beta-defensin-3 [Homo sapiens]             | 97.8      | 97.8        | 5%          | 1e-23   | 97.78%     | <a href="#">AAM62424.1</a>     |

### Graphic Summary

**Alignments**

**Taxonomy**

**SFIGURE 4. The analysis of sequence homology of 2019nCOV vaccine construct**

# Phyre2

Email drvivid1990@163.com  
 Description VACCINE3\_  
 Date Wed May 27 04:25:09  
 BST 2020  
 Unique Job ID a6c2868e1824a367

Detailed template information

| #  | Template | Alignment Coverage                                                                            | 3D Model                                                                            | Confidence | % i.d. | Template Information                                                                                                                                                                                                                                                                      |
|----|----------|-----------------------------------------------------------------------------------------------|-------------------------------------------------------------------------------------|------------|--------|-------------------------------------------------------------------------------------------------------------------------------------------------------------------------------------------------------------------------------------------------------------------------------------------|
| 1  | d1kj6a_  |  Alignment   |    | 99.8       | 100    | <b>Fold:</b> Defensin-like<br><b>Superfamily:</b> Defensin-like<br><b>Family:</b> Defensin                                                                                                                                                                                                |
| 2  | c2kafA_  |  Alignment   |    | 99.7       | 73     | <b>PDB header:</b> viral protein, rna binding protein<br><b>Chain:</b> A: <b>PDB Molecule:</b> non-structural protein 3;<br><b>PDBTitle:</b> solution structure of the sars-unique domain-c from the nonstructural2 protein 3 (nsp3) of the severe acute respiratory syndrome coronavirus |
| 3  | c2lxoA_  |  Alignment   |    | 99.6       | 58     | <b>PDB header:</b> antimicrobial protein, de novo protein<br><b>Chain:</b> A: <b>PDB Molecule:</b> chimeric peptide;<br><b>PDBTitle:</b> identification of the structural traits mediating the antimicrobial2 activity of a chimeric peptide of hbd2 and hbd3                             |
| 4  | c3hd4A_  |  Alignment   |    | 98.7       | 50     | <b>PDB header:</b> viral protein<br><b>Chain:</b> A: <b>PDB Molecule:</b> nucleoprotein;<br><b>PDBTitle:</b> mhv nucleocapsid protein ntd                                                                                                                                                 |
| 5  | d1sska_  |  Alignment |  | 98.7       | 68     | <b>Fold:</b> Coronavirus RNA-binding domain<br><b>Superfamily:</b> Coronavirus RNA-binding domain<br><b>Family:</b> Coronavirus RNA-binding domain                                                                                                                                        |
| 6  | d2bxxa1  |  Alignment |  | 98.4       | 39     | <b>Fold:</b> Coronavirus RNA-binding domain<br><b>Superfamily:</b> Coronavirus RNA-binding domain<br><b>Family:</b> Coronavirus RNA-binding domain                                                                                                                                        |
| 7  | c4ud1B_  |  Alignment |  | 98.4       | 48     | <b>PDB header:</b> viral protein<br><b>Chain:</b> B: <b>PDB Molecule:</b> n protein;<br><b>PDBTitle:</b> structure of the n terminal domain of the mers cov nucleocapsid                                                                                                                  |
| 8  | d2geca1  |  Alignment |  | 98.4       | 45     | <b>Fold:</b> Coronavirus RNA-binding domain<br><b>Superfamily:</b> Coronavirus RNA-binding domain<br><b>Family:</b> Coronavirus RNA-binding domain                                                                                                                                        |
| 9  | c5n4kA_  |  Alignment |  | 98.4       | 43     | <b>PDB header:</b> rna binding protein<br><b>Chain:</b> A: <b>PDB Molecule:</b> nucleoprotein;<br><b>PDBTitle:</b> n-terminal domain of a human coronavirus nl63 nucleocapsid protein                                                                                                     |
| 10 | c1yo4A_  |  Alignment |  | 98.2       | 85     | <b>PDB header:</b> viral protein<br><b>Chain:</b> A: <b>PDB Molecule:</b> hypothetical protein x4;<br><b>PDBTitle:</b> solution structure of the sars coronavirus orf 7a coded x42 protein                                                                                                |
| 11 | d1xaka_  |  Alignment |  | 97.6       | 100    | <b>Fold:</b> Immunoglobulin-like beta-sandwich<br><b>Superfamily:</b> Accessory protein X4 (ORF8, ORF7a)<br><b>Family:</b> Accessory protein X4 (ORF8, ORF7a)                                                                                                                             |



|    |                         |           |                                                                                     |      |     |                                                                                                                                                                                                                                 |
|----|-------------------------|-----------|-------------------------------------------------------------------------------------|------|-----|---------------------------------------------------------------------------------------------------------------------------------------------------------------------------------------------------------------------------------|
| 12 | <a href="#">c1uw7A_</a> | Alignment | 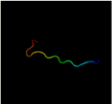   | 95.9 | 100 | <b>PDB header:</b> viral protein<br><b>Chain:</b> A; <b>PDB Molecule:</b> nsp9;<br><b>PDBTitle:</b> nsp9 protein from sars-coronavirus.                                                                                         |
| 13 | <a href="#">d1qz8a_</a> | Alignment |    | 95.9 | 100 | <b>Fold:</b> Replicase NSP9<br><b>Superfamily:</b> Replicase NSP9<br><b>Family:</b> Replicase NSP9                                                                                                                              |
| 14 | <a href="#">c2j98A_</a> | Alignment |    | 94.9 | 69  | <b>PDB header:</b> rna binding protein<br><b>Chain:</b> A; <b>PDB Molecule:</b> replicase polyprotein 1ab;<br><b>PDBTitle:</b> human coronavirus 229e non structural protein 9 cys69ala mutant (nsp9)                           |
| 15 | <a href="#">c5hizA_</a> | Alignment |    | 94.5 | 50  | <b>PDB header:</b> rna binding protein<br><b>Chain:</b> A; <b>PDB Molecule:</b> non-structural protein 9;<br><b>PDBTitle:</b> the structure of pedv nsp9                                                                        |
| 16 | <a href="#">c2rhbD_</a> | Alignment |    | 93.2 | 38  | <b>PDB header:</b> viral protein<br><b>Chain:</b> D; <b>PDB Molecule:</b> uridylyate-specific endoribonuclease;<br><b>PDBTitle:</b> crystal structure of nsp15-h234a mutant- hexamer in2 asymmetric unit                        |
| 17 | <a href="#">d2ozka2</a> | Alignment |    | 92.4 | 79  | <b>Fold:</b> EndoU-like<br><b>Superfamily:</b> EndoU-like<br><b>Family:</b> Nsp15 C-terminal domain-like                                                                                                                        |
| 18 | <a href="#">d2h85a2</a> | Alignment |   | 92.4 | 79  | <b>Fold:</b> EndoU-like<br><b>Superfamily:</b> EndoU-like<br><b>Family:</b> Nsp15 C-terminal domain-like                                                                                                                        |
| 19 | <a href="#">c5ym6B_</a> | Alignment |  | 91.6 | 35  | <b>PDB header:</b> rna binding protein<br><b>Chain:</b> B; <b>PDB Molecule:</b> nsp9;<br><b>PDBTitle:</b> crystal structure of porcine delta coronavirus nsp9                                                                   |
| 20 | <a href="#">d2cira1</a> | Alignment |  | 81.0 | 57  | <b>Fold:</b> Nucleocapsid protein dimerization domain<br><b>Superfamily:</b> Nucleocapsid protein dimerization domain<br><b>Family:</b> Coronavirus nucleocapsid protein                                                        |
| 21 | <a href="#">c5yvda_</a> | Alignment | not modelled                                                                        | 79.0 | 37  | <b>PDB header:</b> hydrolase<br><b>Chain:</b> A; <b>PDB Molecule:</b> nsp15;<br><b>PDBTitle:</b> structural and biochemical characterization of endoribonuclease nsp152 encoded by middle east respiratory syndrome coronavirus |
| 22 | <a href="#">d1fd3a_</a> | Alignment | not modelled                                                                        | 77.1 | 36  | <b>Fold:</b> Defensin-like<br><b>Superfamily:</b> Defensin-like<br><b>Family:</b> Defensin                                                                                                                                      |
| 23 | <a href="#">c4rs4A_</a> | Alignment | not modelled                                                                        | 74.5 | 26  | <b>PDB header:</b> hydrolase<br><b>Chain:</b> A; <b>PDB Molecule:</b> uridylyate-specific endoribonuclease;<br><b>PDBTitle:</b> crystal structure and mutational analysis of the endoribonuclease from2 human coronavirus 229e  |
| 24 | <a href="#">d1bnba_</a> | Alignment | not modelled                                                                        | 67.3 | 44  | <b>Fold:</b> Defensin-like<br><b>Superfamily:</b> Defensin-like<br><b>Family:</b> Defensin                                                                                                                                      |
| 25 | <a href="#">c2drtB_</a> | Alignment |  | 64.7 | 100 | <b>PDB header:</b> structural protein<br><b>Chain:</b> B; <b>PDB Molecule:</b> collagen like peptide;<br><b>PDBTitle:</b> structure analysis of (pog)4-log-(pog)5                                                               |
| 26 | <a href="#">c2drtA_</a> | Alignment |  | 64.7 | 100 | <b>PDB header:</b> structural protein<br><b>Chain:</b> A; <b>PDB Molecule:</b> collagen like peptide;<br><b>PDBTitle:</b> structure analysis of (pog)4-log-(pog)5                                                               |

|    |                         |           |                                                                                   |      |     |                                                                                                                                                                                                                                                                                                    |
|----|-------------------------|-----------|-----------------------------------------------------------------------------------|------|-----|----------------------------------------------------------------------------------------------------------------------------------------------------------------------------------------------------------------------------------------------------------------------------------------------------|
| 27 | <a href="#">c2mq5D_</a> | Alignment | not modelled                                                                      | 64.4 | 48  | <b>PDB header:</b> hydrolase<br><b>Chain:</b> D; <b>PDB Molecule:</b> thp_t_chain;<br><b>PDBTitle:</b> transient collagen triple helix binding to a key metalloproteinase in2 invasion and development: spin labels to structure                                                                   |
| 28 | <a href="#">c2l3aA_</a> | Alignment | 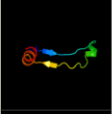 | 63.3 | 27  | <b>PDB header:</b> structural genomics, unknown function<br><b>Chain:</b> A; <b>PDB Molecule:</b> uncharacterized protein;<br><b>PDBTitle:</b> solution nmr structure of homodimer protein sp_0782 (7-79) from2 streptococcus pneumoniae northeast structural genomics consortium3 target spr104 . |
| 29 | <a href="#">c3obhA_</a> | Alignment |  | 62.9 | 28  | <b>PDB header:</b> structural genomics, unknown function<br><b>Chain:</b> A; <b>PDB Molecule:</b> uncharacterized protein;<br><b>PDBTitle:</b> x-ray crystal structure of protein sp_0782 (7-79) from streptococcus2 pneumoniae. northeast structural genomics consortium target spr104            |
| 30 | <a href="#">c2mq5C_</a> | Alignment | not modelled                                                                      | 60.7 | 48  | <b>PDB header:</b> hydrolase<br><b>Chain:</b> C; <b>PDB Molecule:</b> thp_l_and_m_chain;<br><b>PDBTitle:</b> transient collagen triple helix binding to a key metalloproteinase in2 invasion and development: spin labels to structure                                                             |
| 31 | <a href="#">c2mq5B_</a> | Alignment | not modelled                                                                      | 60.7 | 48  | <b>PDB header:</b> hydrolase<br><b>Chain:</b> B; <b>PDB Molecule:</b> thp_l_and_m_chain;<br><b>PDBTitle:</b> transient collagen triple helix binding to a key metalloproteinase in2 invasion and development: spin labels to structure                                                             |
| 32 | <a href="#">c2ltdA_</a> | Alignment |  | 59.5 | 33  | <b>PDB header:</b> structural genomics, unknown function<br><b>Chain:</b> A; <b>PDB Molecule:</b> uncharacterized protein ydbc;<br><b>PDBTitle:</b> solution nmr structure of apo ydbc from lactococcus lactis, northeast2 structural genomics consortium (nesg) target kr150                      |
| 33 | <a href="#">c6hg7A_</a> | Alignment | not modelled                                                                      | 58.9 | 52  | <b>PDB header:</b> structural protein<br><b>Chain:</b> A; <b>PDB Molecule:</b> collagen alpha-1(ii) chain;<br><b>PDBTitle:</b> crystal structure of a collagen ii fragment containing the binding2 site of pedf and comp. (pog)4-lkg hrg ftg lqg-pog(4)                                            |
| 34 | <a href="#">c6hg7C_</a> | Alignment | not modelled                                                                      | 58.9 | 52  | <b>PDB header:</b> structural protein<br><b>Chain:</b> C; <b>PDB Molecule:</b> collagen alpha-1(ii) chain;<br><b>PDBTitle:</b> crystal structure of a collagen ii fragment containing the binding2 site of pedf and comp. (pog)4-lkg hrg ftg lqg-pog(4)                                            |
| 35 | <a href="#">c6hg7B_</a> | Alignment | not modelled                                                                      | 58.9 | 52  | <b>PDB header:</b> structural protein<br><b>Chain:</b> B; <b>PDB Molecule:</b> collagen alpha-1(ii) chain;<br><b>PDBTitle:</b> crystal structure of a collagen ii fragment containing the binding2 site of pedf and comp. (pog)4-lkg hrg ftg lqg-pog(4)                                            |
| 36 | <a href="#">c6jklC_</a> | Alignment | not modelled                                                                      | 57.8 | 67  | <b>PDB header:</b> structural protein<br><b>Chain:</b> C; <b>PDB Molecule:</b> a triple-helix region of human collagen type ii;<br><b>PDBTitle:</b> structure of a triple-helix region of human collagen type ii                                                                                   |
| 37 | <a href="#">c6jklA_</a> | Alignment | not modelled                                                                      | 57.8 | 67  | <b>PDB header:</b> structural protein<br><b>Chain:</b> A; <b>PDB Molecule:</b> a triple-helix region of human collagen type ii;<br><b>PDBTitle:</b> structure of a triple-helix region of human collagen type ii                                                                                   |
| 38 | <a href="#">c6jklB_</a> | Alignment | not modelled                                                                      | 57.8 | 67  | <b>PDB header:</b> structural protein<br><b>Chain:</b> B; <b>PDB Molecule:</b> a triple-helix region of human collagen type ii;<br><b>PDBTitle:</b> structure of a triple-helix region of human collagen type ii                                                                                   |
| 39 | <a href="#">c2dtxA_</a> | Alignment | not modelled                                                                      | 57.6 | 100 | <b>PDB header:</b> structural protein<br><b>Chain:</b> A; <b>PDB Molecule:</b> collagen like peptide;<br><b>PDBTitle:</b> structure analysis of (pog)4-(log)2-(pog)4                                                                                                                               |
| 40 | <a href="#">c2dtxB_</a> | Alignment | not modelled                                                                      | 57.4 | 100 | <b>PDB header:</b> structural protein<br><b>Chain:</b> B; <b>PDB Molecule:</b> collagen like peptide;<br><b>PDBTitle:</b> structure analysis of (pog)4-(log)2-(pog)4                                                                                                                               |
| 41 | <a href="#">c3pm7A_</a> | Alignment | not modelled                                                                      | 57.3 | 33  | <b>PDB header:</b> structural genomics, unknown function<br><b>Chain:</b> A; <b>PDB Molecule:</b> uncharacterized protein;<br><b>PDBTitle:</b> crystal structure of ef_3132 protein from enterococcus faecalis at the2 resolution 2a. northeast structural genomics consortium target efr184       |
| 42 | <a href="#">d2ca1a1</a> | Alignment | not modelled                                                                      | 57.2 | 29  | <b>Fold:</b> Nucleocapsid protein dimerization domain<br><b>Superfamily:</b> Nucleocapsid protein dimerization domain<br><b>Family:</b> Coronavirus nucleocapsid protein                                                                                                                           |
| 43 | <a href="#">c2dtxC_</a> | Alignment | not modelled                                                                      | 55.6 | 100 | <b>PDB header:</b> structural protein<br><b>Chain:</b> C; <b>PDB Molecule:</b> collagen like peptide;<br><b>PDBTitle:</b> structure analysis of (pog)4-(log)2-(pog)4                                                                                                                               |
| 44 | <a href="#">d1ut3a_</a> | Alignment | not modelled                                                                      | 55.3 | 50  | <b>Fold:</b> Defensin-like<br><b>Superfamily:</b> Defensin-like<br><b>Family:</b> Defensin                                                                                                                                                                                                         |
| 45 | <a href="#">c1ut3A_</a> | Alignment | not modelled                                                                      | 55.3 | 50  | <b>PDB header:</b> antibiotic<br><b>Chain:</b> A; <b>PDB Molecule:</b> spheniscin-2;<br><b>PDBTitle:</b> solution structure of spheniscin-2, a beta-defensin from2 penguin stomach preserving food                                                                                                 |
| 46 | <a href="#">d1e4qa_</a> | Alignment | not modelled                                                                      | 53.2 | 36  | <b>Fold:</b> Defensin-like<br><b>Superfamily:</b> Defensin-like<br><b>Family:</b> Defensin                                                                                                                                                                                                         |
| 47 | <a href="#">c3ponB_</a> | Alignment | not modelled                                                                      | 52.6 | 81  | <b>PDB header:</b> unknown function<br><b>Chain:</b> B; <b>PDB Molecule:</b> mb1 collagen-like peptide;<br><b>PDBTitle:</b> crystal structure of mbl collagen-like peptide                                                                                                                         |
| 48 | <a href="#">c3pobC_</a> | Alignment | not modelled                                                                      | 52.6 | 81  | <b>PDB header:</b> hydrolase<br><b>Chain:</b> C; <b>PDB Molecule:</b> mb1 collagen-like peptide;<br><b>PDBTitle:</b> crystal structure of masp-1 cub2 domain in complex with the collagen-2 like domain of mbl                                                                                     |
|    |                         |           |                                                                                   |      |     | <b>PDB header:</b> unknown function                                                                                                                                                                                                                                                                |

**SFIGURE 5. The templates were employed modeling of vaccine structure**

# Phyre2

Email drvid1990@163.com  
Description VACCINE3\_  
Date Wed May 27 04:25:09  
BST 2020  
Unique Job ID a6c2868e1824a367

## Secondary structure and disorder prediction

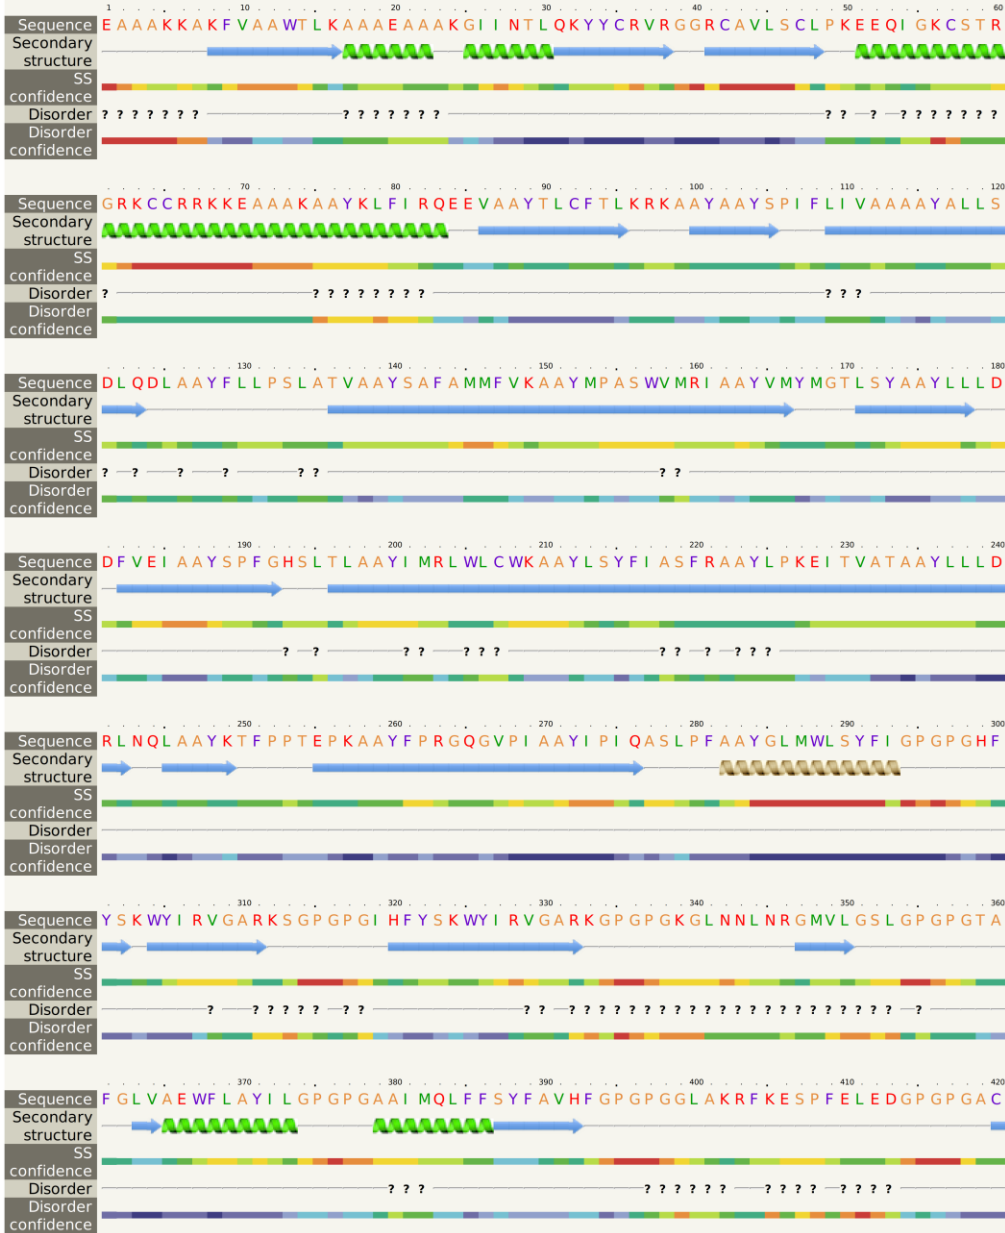

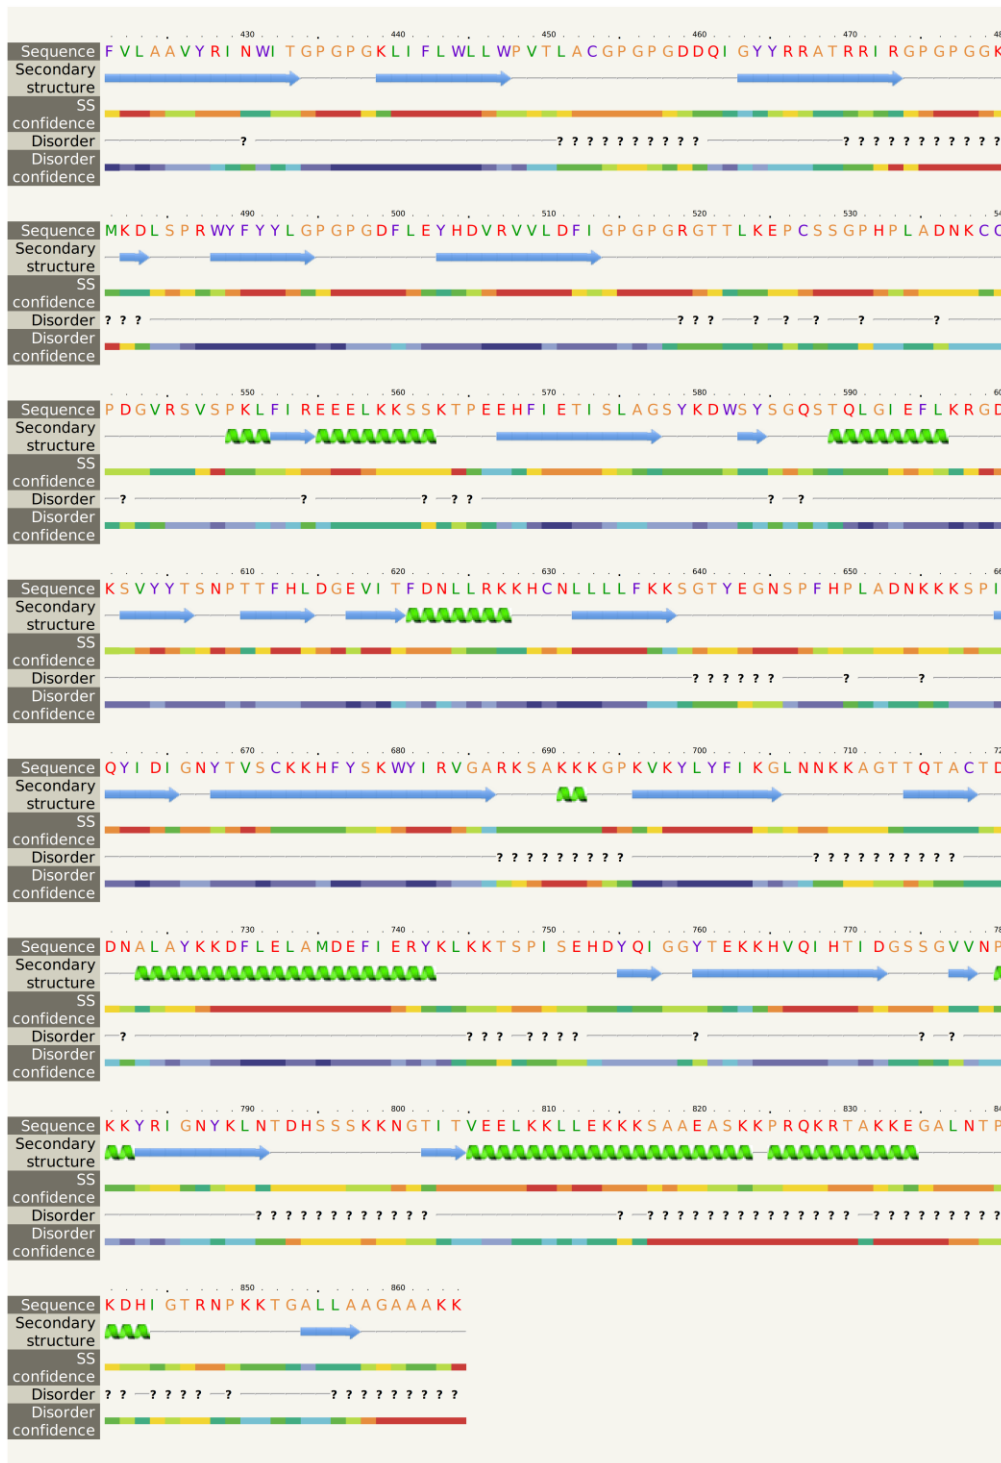

Confidence Key  
 High(9) ██████████ Low (0)  
 ? Disordered ( 27%)  
 🌀 Alpha helix ( 18%)  
 ➡ Beta strand ( 44%)  
 🌀 TM helix ( 21%)

**SFIGURE 6. The disorder regions and profile of constructed vaccine**

**STABLE3. The details of five candidate models generated from the GalaxyRefine server**

| Model   | GDT    | RMSD  | MolProbity | Clashscore | Poor rotamer | Ramafavore |
|---------|--------|-------|------------|------------|--------------|------------|
| Initial | 1.0000 | 0.000 | 4.325      | 172.6      | 9.3          | 63.5       |
| MODEL 1 | 0.9922 | 0.260 | 2.049      | 8.9        | 0.3          | 89.1       |
| MODEL 2 | 0.9933 | 0.260 | 2.052      | 9.0        | 0.3          | 89.2       |
| MODEL 3 | 0.9957 | 0.234 | 2.107      | 10.1       | 0.3          | 88.6       |
| MODEL 4 | 0.9916 | 0.246 | 2.081      | 9.7        | 0.4          | 89.1       |
| MODEL 5 | 0.9896 | 0.268 | 2.033      | 8.6        | 0.3          | 89.2       |

GDT: global distance test; RMSD: The Root-mean-square deviation.

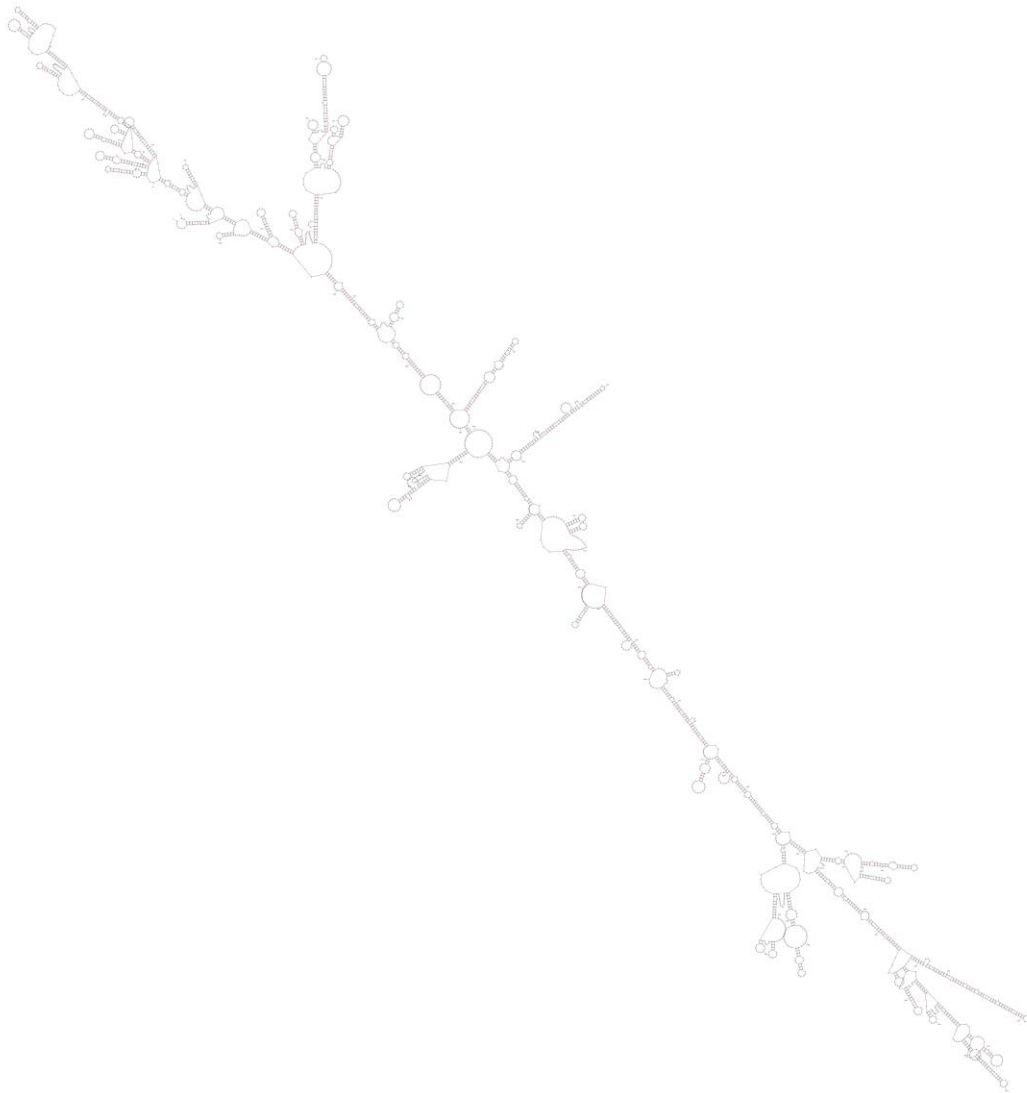

$dG = -715.17$  [Initially -810.50] vaccine

**SFIGURE 7. The secondary structure of constructed vaccine mRNA**
